# Supplementary material for: Thermal energy storage in a supramolecular assembly of [C6H11NH3]+[CF3COO]−(C6H11= cyclohexyl)
Source: Royal Society of Chemistry journal article supplement (doi:10.1039/c5ta02166a), 2015-01-01
Supplement: c5ta02166a1.pdf [file c5ta02166a1.pdf]

## Supplementary Information

### Thermal Energy Storage in A Supramolecular Assembly of $[\text{C}_6\text{H}_{11}\text{NH}_3]^+ [\text{CF}_3\text{COO}]^-$ ( $\text{C}_6\text{H}_{11}$ = Cyclohexyl)

Jiangbin Guo,<sup>a</sup> Wen Tang,<sup>a</sup> Binbin Wu,<sup>a</sup> Haixia Zhao,<sup>\*a</sup> Lasheng Long<sup>\*a</sup> and Lansun Zheng<sup>a</sup>

<sup>a</sup>Collaborative innovation center of chemistry for energy materials, State Key Laboratory of Physical Chemistry of Solid Surfaces and Department of Chemistry, College of Chemistry and Chemical Engineering, Xiamen University, Xiamen 361005, P.R. China.

Fax: (+) 86-592-218-3047

E-mail: lslong@xmu.edu.cn, hxzhao@xmu.edu.cn

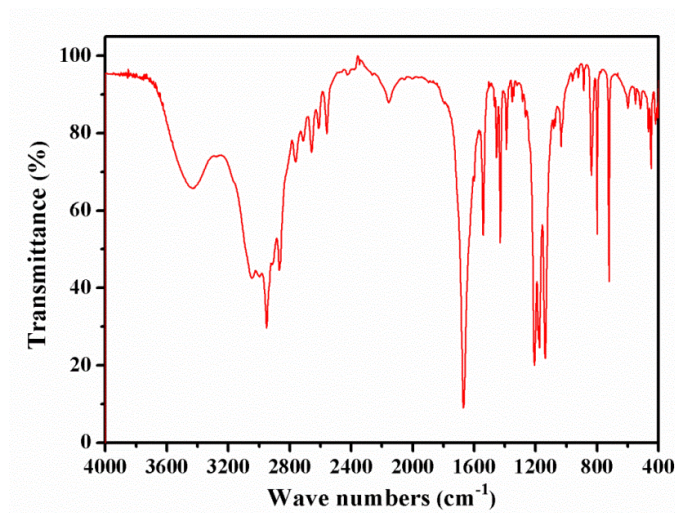

Figure S1. IR spectrum of compound 1

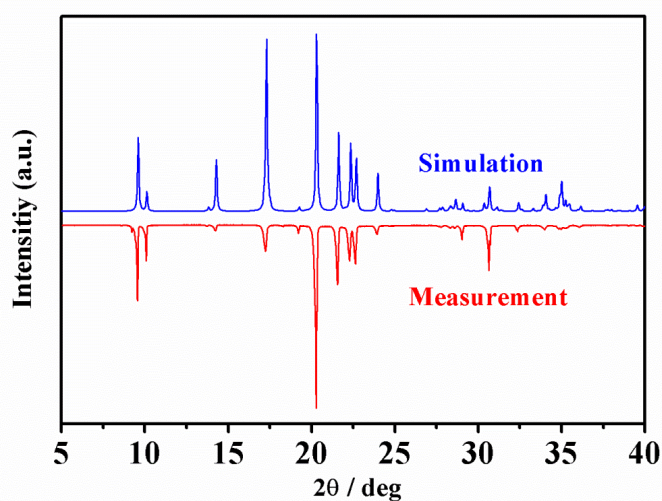

Figure S2. Simulated and experimental XRD powder patterns for compounds 1.

**Table S1.** Crystal data and structure refinement of **1** at 100K and 340 K, respectively

|                                                      |                                                               |                                                               |
|------------------------------------------------------|---------------------------------------------------------------|---------------------------------------------------------------|
| Chemical formula                                     | C <sub>8</sub> H <sub>14</sub> F <sub>3</sub> NO <sub>2</sub> | C <sub>8</sub> H <sub>14</sub> F <sub>3</sub> NO <sub>2</sub> |
| Temperature / K                                      | 100(2)                                                        | 340(2)                                                        |
| Formula weight                                       | 213.2                                                         | 213.2                                                         |
| Crystal system                                       | monoclinic                                                    | monoclinic                                                    |
| Space group                                          | <i>I</i> 2/ <i>a</i>                                          | <i>C</i> 2/ <i>m</i>                                          |
| <i>a</i> / Å                                         | 17.264(3)                                                     | 18.1351(16)                                                   |
| <i>b</i> / Å                                         | 6.5684(2)                                                     | 6.6817(6)                                                     |
| <i>c</i> / Å                                         | 17.7966(19)                                                   | 9.0685(8)                                                     |
| <i>β</i> / deg                                       | 91.40(2)                                                      | 94.199(7)                                                     |
| Volume / Å <sup>3</sup>                              | 2017.5(5)                                                     | 1095.91(7)                                                    |
| <i>Z</i>                                             | 8                                                             | 4                                                             |
| <i>D</i> <sub>c</sub> / g.cm <sup>-3</sup>           | 1.404                                                         | 1.292                                                         |
| <i>R</i> <sub>1</sub> [ <i>I</i> > 2σ( <i>I</i> )]   | 0.0301                                                        | 0.1154                                                        |
| ω <i>R</i> <sub>2</sub> [ <i>I</i> > 2σ( <i>I</i> )] | 0.0804                                                        | 0.3411                                                        |

$\alpha R_1 = \sum ||F_o| - |F_c| || / \sum |F_o|$ ,  $\omega R_2 = [\sum (|F_o|^2 - |F_c|^2) / \sum |F_o|^2]^{1/2}$

Single-crystal X-ray structure determination: Data collections were performed on an Agilent technologies Super Nova Micro Focus using Mo-K $\alpha$  radiation at 100 K and 340 K for **1**. Absorption corrections were applied by using the multi-scan program. The structures were solved by direct methods, and non-hydrogen atoms were refined anisotropically by least-squares on F<sup>2</sup> using the SHELXTL-97 program.<sup>[1]</sup> All the hydrogen atoms were generated geometrically. CCDC 1044765 and 1025090 for **1** contain the supplementary crystallographic data for this paper. These data can be obtained free of charge from the Cambridge Crystallographic Data Centre via [www.ccdc.cam.ac.uk/data\\_request/cif](http://www.ccdc.cam.ac.uk/data_request/cif).

[1] *SHELXTL 6.10*, Bruker Analytical Instrumentation, Madison, WI, **2000**.

**Table S2.** Hydrogen-bond geometry (Å, °) in **1**.

| 100 K           | D-H  | H···A | D···A | D-H···A |
|-----------------|------|-------|-------|---------|
| N1-H1A...O1 i   | 0.89 | 1.95  | 2.824 | 168.6   |
| N1-H1B...O1 ii  | 0.89 | 1.93  | 2.808 | 170.9   |
| N1-H1C...O2     | 0.89 | 1.90  | 2.786 | 174.8   |
| 340 K           |      |       |       |         |
| N1-H1A...O1 i   | 0.90 | 1.86  | 2.749 | 169.7   |
| N1-H1B...O2 ii  | 0.90 | 1.93  | 2.797 | 161.5   |
| N1-H1B...O2 iii | 0.90 | 1.93  | 2.797 | 161.5   |
| N1-H1A...O2     | 0.90 | 2.07  | 2.905 | 154.8   |

Symmetry codes (100 K): (i)  $x, y-1, z$ ; (ii)  $-x+1, y-1/2, -z+1/2$

Symmetry codes (340 K): (i)  $x, -y+1, z$ ; (ii)  $-x+1/2, -y+1/2, -z+1$ ; (iii)  $-x+1/2, y-1/2, -z+1$ ;

**Table S3.** The energy density of **1** at different temperature

| <b><i>T</i> (K)</b> | <b><i>C<sub>p</sub></i><br/>(J· kg<sup>-1</sup>· K<sup>-1</sup>)</b> | <b>Energy<br/>Density×10<sup>6</sup><br/>(J· m<sup>-3</sup>· K<sup>-1</sup>)</b> |
|---------------------|----------------------------------------------------------------------|----------------------------------------------------------------------------------|
| 273                 | 920                                                                  | 1.19                                                                             |
| 278                 | 949                                                                  | 1.22                                                                             |
| 283                 | 980                                                                  | 1.27                                                                             |
| 288                 | 1015                                                                 | 1.31                                                                             |
| 293                 | 1044                                                                 | 1.35                                                                             |
| 298                 | 1083                                                                 | 1.40                                                                             |
| 303                 | 1127                                                                 | 1.46                                                                             |
| 308                 | 1181                                                                 | 1.53                                                                             |
| 313                 | 1249                                                                 | 1.61                                                                             |
| 318                 | 1343                                                                 | 1.74                                                                             |
| 320                 | 1401                                                                 | 1.81                                                                             |
| 322                 | 1476                                                                 | 1.91                                                                             |
| 324                 | 2018                                                                 | 2.61                                                                             |
| 325                 | 5394                                                                 | 6.97                                                                             |
| 326                 | 6712                                                                 | 8.67                                                                             |
| 327                 | 4411                                                                 | 5.70                                                                             |
| 328                 | 2540                                                                 | 3.28                                                                             |
| 330                 | 1459                                                                 | 1.89                                                                             |
| 332                 | 1257                                                                 | 1.62                                                                             |
| 334                 | 1233                                                                 | 1.59                                                                             |
| 336                 | 1237                                                                 | 1.60                                                                             |
| 338                 | 1245                                                                 | 1.61                                                                             |
| 343                 | 1267                                                                 | 1.64                                                                             |
| 348                 | 1288                                                                 | 1.66                                                                             |
| 353                 | 1319                                                                 | 1.70                                                                             |
| 358                 | 1342                                                                 | 1.73                                                                             |
| 363                 | 1359                                                                 | 1.76                                                                             |
| 368                 | 1396                                                                 | 1.80                                                                             |
| 373                 | 1345                                                                 | 1.85                                                                             |

**Table S4.** Thermal conductivity for Selected Materials

| Compound           | Thermal conductivity (W/mK) |
|--------------------|-----------------------------|
| Paraffin C18       | 0.15                        |
| Polyglycol E400    | 0.187                       |
| Paraffin C21 - C50 | 0.21                        |
| Naphthalene        | 0.341                       |
| Capric acid        | 0.16                        |
| Lauric acid        | 0.16                        |
| Myristic acid      | 0.17                        |

### The detail of thermal expansion

Solid-solid phase change is always accompanied very little thermal expansion when comparing to solid-liquid, solid-gas phase change. The thermal expansion coefficient can be calculated with the following equation. (L. J. Wang, D. Meng, Appl. Energy, **2010**, 87, 2660.)

$$\alpha = \frac{(V_2 - V_1)}{V_1(T_2 - T_1)} = \frac{\frac{m}{\rho_2} - \frac{m}{\rho_1}}{\frac{m}{\rho_1}(T_2 - T_1)} = \frac{\rho_1 - \rho_2}{\rho_2(T_2 - T_1)}$$

Where  $\alpha$  is the volume expansion coefficient of the PCM,  $V_1$  and  $V_2$  are the volume values,  $\rho_1$  and  $\rho_2$  are the density of the PCM at the temperature of  $T_1$  and  $T_2$ , respectively. Based on the data, the thermal expansion coefficient of **1** is about  $3.6 \times 10^{-4} \text{ K}^{-1}$  over the temperature range from 100 K to 340 K, indicating that the compound  $[\text{C}_6\text{H}_{11}\text{NH}_3]^+ [\text{CF}_3\text{COO}]^-$  accompanied very little thermal expansion in the phase change process.

## The detail measurement of thermal conductivity

Thermal conductivity was calculated on the basis of the following equation:

$$\lambda(T) = \alpha(T) * C_p(T) * \rho(T)$$

Where  $\alpha$  is the thermal diffusion coefficient,  $C_p$  is specific heat capacity,  $\rho$  is the mass density of the compound.

(1) Thermal diffusion coefficient ( $\alpha$ ) (Figure S4) was measured with powder pellet on a NETZSCH LFA457/2/G via the laser flash method under nitrogen in the temperature range from 313 to 363 K. The powder pellet was prepared under 14 Mpa pressure for 5 min, and diameter of the powder pellet was about 12.7 mm. Each side of the pellet was coated with graphite. The sample holder was graphite one. The laser power was 1538 V and light transmission was 100%. The data were analysed through direct non-linear regression routines with “Cowan model + Pulse Correction”.

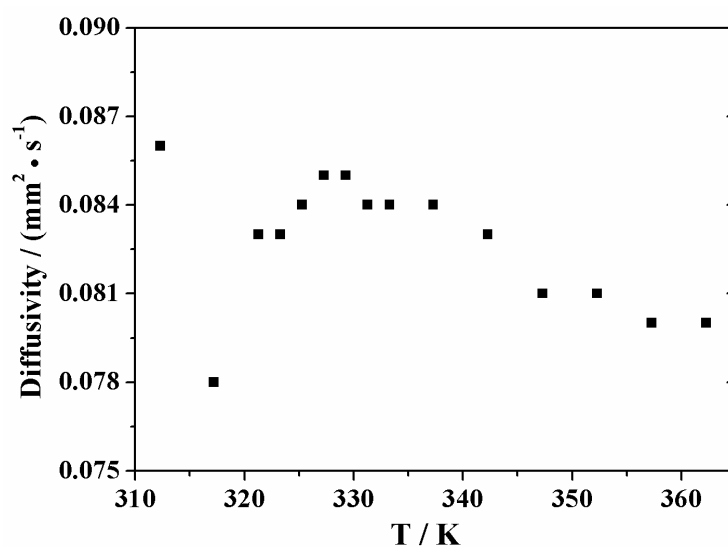

**Figure S3.** Thermal diffusion coefficient at different temperatures for **1**.

(2)  $C_p$  at different temperatures were obtained by heating and cooling the sample (2.516 mg) in an aluminum crucible, and sweeping rate was 10 K·min<sup>-1</sup> under nitrogen atmosphere in the temperature range of 273-373 K on a NETZSCH DSC 200F3 differential scanning calorimetry.

(3) The values of  $\rho$  at different temperatures were taken the one at 340 K, which was obtained through single-crystal data, because thermal expansion of the solid-state sample was very small.
